# Supplementary material
Source: publisher figshare collection journal article supplement (https://gsajournals.figshare.com/articles/dataset/_/6127709)
Supplement: Supplementary file 1 [file 3]

| Table S1 Optogenetic integration with low concentrations of plasmids | | | | | | |
| --- | --- | --- | --- | --- | --- | --- |
|  | Total plasmid conc. (ng/µl) |  | # transgenic animals | | |  |
| Plasmid | # P0 | F1 | F2 | High F2 | Integrant |
| *rol-6* + P*ttx-3*-RFP | 10 | 12 | 7 | 0 | 0 | 0 |
| *rol-6* + P*ttx-3*-RFP | 10 | 12 | 2 | 0 | 0 | 0 |
| *rol-6* + P*ttx-3*-RFP | 25 | 12 | 44 | 7 | 6 | 1 |
| P*ttx-3*-RFP + P*rgef-1*-GFP::EFA-6N | 25 | 12 | 4 | 1 | 1 | 0 |
